# Supplementary material
Source: MDPI journal article supplement (https://www.mdpi.com/1099-4300/24/11/1572)
Supplement: s1 [file s1]

1 Department of Chemistry, University of Rome 'La Sapienza', P.le Aldo Moro 5, I-00185 Rome, Italy  
2 Istituto dei Sistemi Complessi-Consiglio Nazionale delle Ricerche-ISC-CNR U.O.S. Sapienza, P.le A. Moro 5,  
00185 Rome, Italy  
3 Department of Physical and Chemical Sciences, University of L'Aquila, Via Vetoio, I-67100 L' Aquila, Italy;  
\* Correspondence: fabio.ramondo@uniroma1.it

## Supplementary Materials

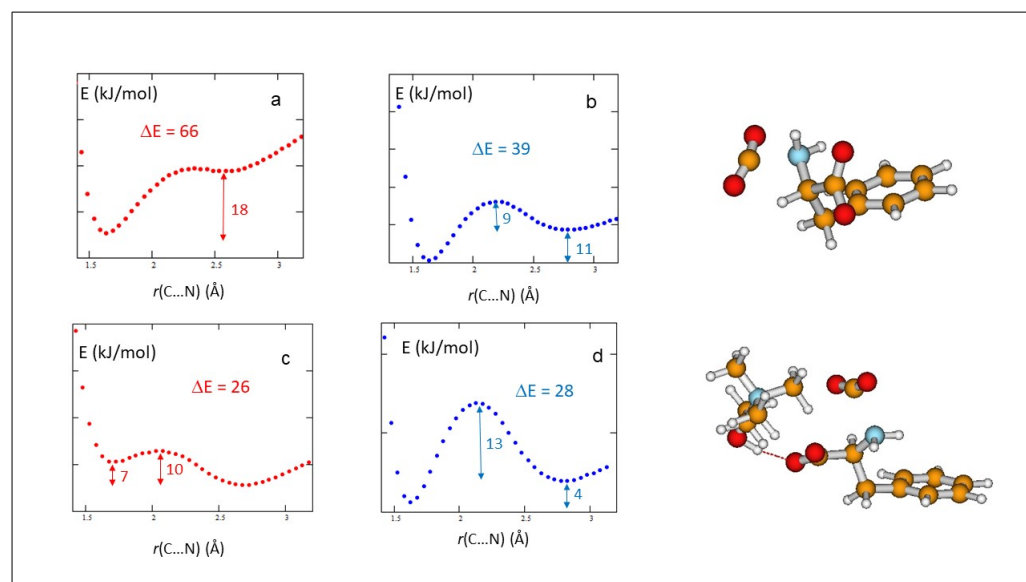
$$\Delta E \text{ is calculated as } E_{[Phe-CO_2]^-} - (E_{[Phe]^-} + E_{CO_2})$$

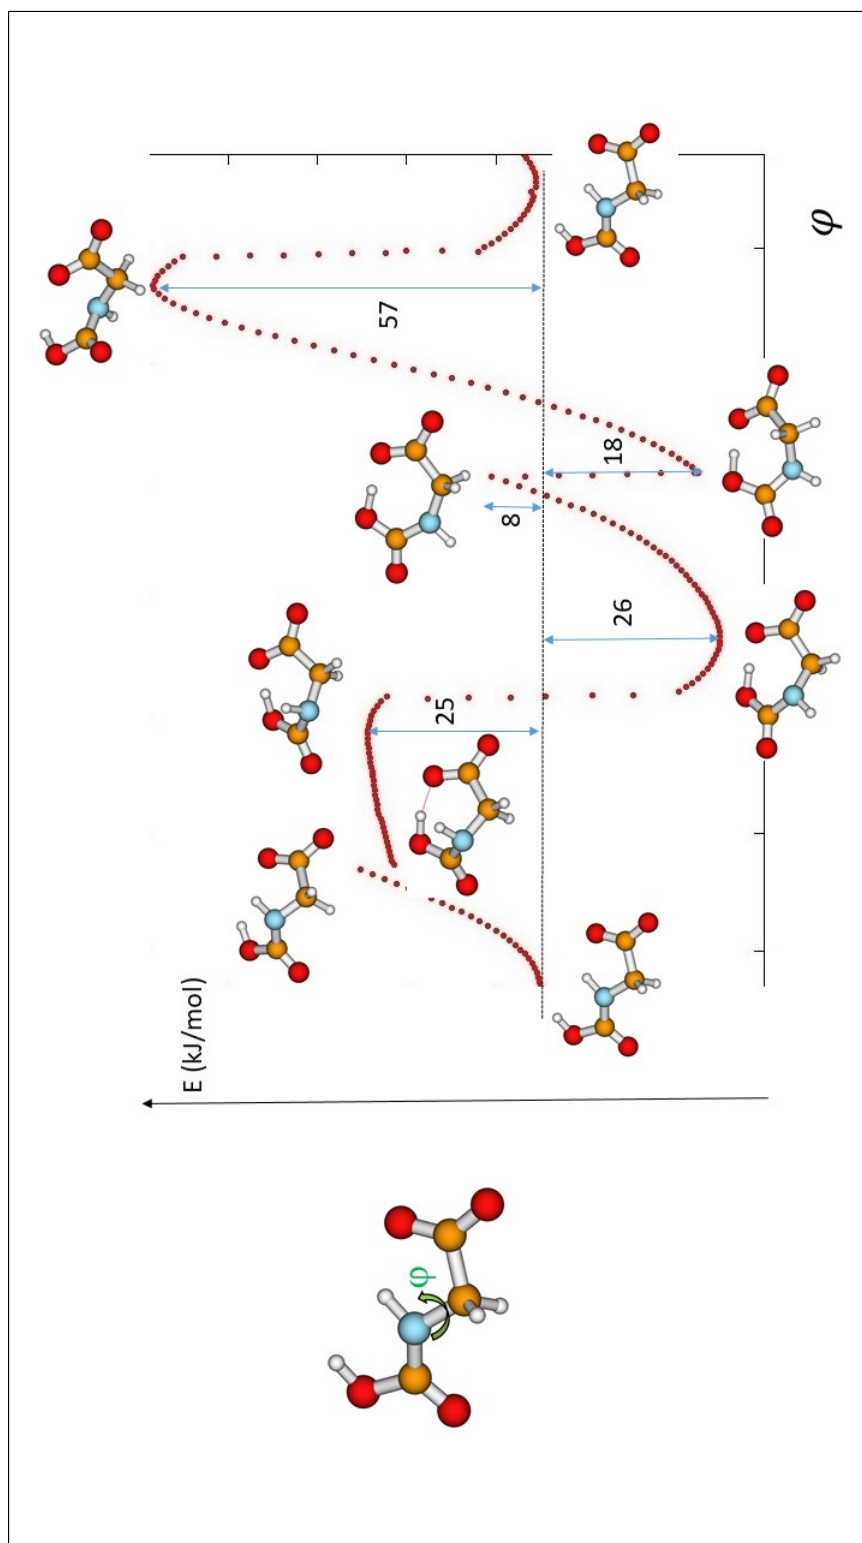

**Figure S2.** M062X/6-311++G\*\* energy profile in function of the dihedral angle ( $\phi$ ) that describes the torsion about the C-N bond of the [Gly] anion calculated by PCM model. The stationary points localized in the PES scan are reproduced in Figure.
